# Supplementary material
Source: publisher figshare collection journal article supplement (https://acs.figshare.com/ndownloader/files/25808198)
Supplement: Supplementary file 1 [file 25808198]

# **The *E. coli* Cas1/2 endonuclease complex modifies self-targeting CRISPR/Cascade spacers reducing silencing guide stability.**

Zhixia Ye<sup>1,2</sup>, Eirik A. Moreb<sup>1</sup>, Shuai Li<sup>1,2</sup>, Juliana Lebeau<sup>1</sup>, Romel Menacho-Melgar<sup>1</sup>, Matthew Munson<sup>2</sup> and Michael D. Lynch<sup>1,4</sup>

<sup>1</sup> Department of Biomedical Engineering, Duke University

<sup>2</sup> DMC Biotechnologies, Inc. Durham, NC

<sup>3</sup> Department of Chemistry, Duke University

<sup>4</sup> To whom all correspondence should be addressed.

## **Supplemental Materials**

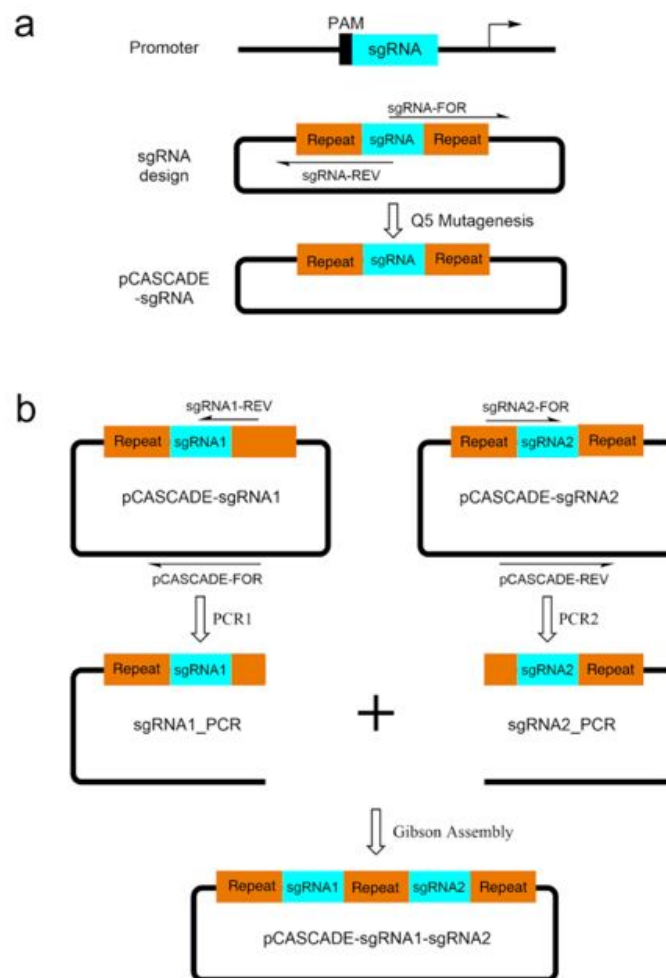

**Figure S1:** pCASCADE construction scheme. (a) single sgRNA cloning; (b) double sgRNA. gRNA arrays of more than two sgRNA are constructed similar to the double sgRNA.

**Tables S1-S5:** Refer to a Separate Spreadsheet for Supplemental Tables.
